1 **The cross-cultural validation of the Beach Center Family**  
2 **Quality of Life Scale among persons affected by leprosy**  
3 **and podoconiosis in Northwest, Ethiopia**

4 **Moges Wubie Aycheh<sup>1,2\*</sup>, Anna Tiny van 't Noordende<sup>3</sup>, Nurilign Abebe Moges<sup>2</sup>,**  
5 **Alice Schippers<sup>1,3</sup>**

6 *<sup>1</sup>University of Humanistic Studies, Care Ethics, Utrecht, The Netherlands,*

7 *<sup>2</sup>Department of Public Health, College of Health Sciences, Debre Markos University, Debre*  
8 *Markos, Ethiopia,*

9 *<sup>3</sup>Disability Studies in Nederland, Utrecht, The Netherlands.*

10 *\*Corresponding author. E-mail: [mogeswub@gmail.com](mailto:mogeswub@gmail.com)*

11

12 **Abstract**

13 **Background**

14 The Beach Center Family Quality of Life Scale was developed and validated in different  
15 languages in different countries. However, this scale is not yet validated in the Ethiopian  
16 Amharic language context. Therefore, this study aimed to investigate the cross-cultural validity  
17 of the Beach Center Family Quality of Life Scale, among Ethiopian families of persons affected  
18 by leprosy and podoconiosis.

## 19 **Methodology**

20 We explored the semantic equivalence, internal consistency, reproducibility, floor and ceiling  
21 effects, and interpretability of the Beach Centre Family Quality of Life Scale in Amharic. After  
22 translating, and back-translating the instrument, a cross-sectional study was conducted. A total  
23 of 302 adult persons affected by leprosy and podoconiosis, who have a view of their family life  
24 were asked about their level of satisfaction using the Beach Center Family Quality of Life Scale.  
25 In addition, 50 participants were interviewed again two weeks after the first assessment to  
26 check the reproducibility of the scale. Participants were recruited in the East Gojjam zone in  
27 Northwest Ethiopia.

## 28 **Results**

29 The findings of this study showed that the Beach Center Family Quality of Life Scale had high  
30 internal consistency (Cronbach's alpha of 0.913) and reproducibility (intra-class correlation  
31 coefficient of 0.857). The standard error of measurement was 3.01, which is 2.4% of the total  
32 score range. The smallest detectable change was 8.34. Confirmatory factor analysis showed  
33 adequate factor loadings and model fit indices like the original scale. The composite reliability  
34 and average variance extracted from the scale were acceptable. No floor and ceiling effects  
35 were found.

## 36 **Conclusions**

37 Our findings indicate that the Amharic version of the Beach Center Family Quality of Life scale  
38 has adequate cultural validity to assess the family quality of life in Ethiopian families of persons  
39 affected by leprosy and podoconiosis.

40

41

## 42 **Author Summary**

43 The presence of persons with disabilities in the family can affect a family's quality of life.  
44 Neglected tropical diseases such as leprosy and podoconiosis can lead to disabilities and have  
45 been found to influence Family Quality of Life. To adequately assess the family quality of life of  
46 persons affected by leprosy and podoconiosis, we have selected the Beach Center Family  
47 Quality of Life scale. However, this scale has not been validated in the Ethiopian context  
48 previously. In this study, the authors aimed to investigate the cross-cultural validity of the  
49 Beach Center Family Quality of Life scale in families with one or more persons affected by  
50 leprosy and podoconiosis in Ethiopia.

51 A total of 302 participants were included in this study. The results show the scale to be  
52 adequately reliable and valid in the target country's culture and language. Based on the  
53 findings, the authors recommend using this scale among families of persons affected by leprosy  
54 and podoconiosis.

55

## 56 **Introduction**

57 Family Quality of Life (FQoL) is an extension of individual quality of life (QoL) [1-3]. Recently, the  
58 concept of FQoL has developed out of the broader quality of life work and has been applied to  
59 families in which a member has an intellectual disability [4], and in families with members with  
60 other conditions such as Alzheimer's disease, serious medical conditions, and families that live

61 in disadvantaged communities [5]. FQoL is a multidimensional construct [3, 6, 7] and is defined  
62 as “conditions where the family’s needs are met, and family members enjoy their life together  
63 as a family and have the chance to do things which are important to them” [8]. Using empirical  
64 data from their own literature review, Zuna et al proposed four main concepts that influence  
65 variations in FQoL: (i) systemic concepts (systems, policies, and programs); (ii) performance  
66 concepts (services, supports, and practices); (iii) individual-member concepts (demographics,  
67 characteristics, and beliefs); and (iv) family-unit concepts (characteristics, and dynamics) [3].  
68 Zuna et al four combined concepts changed to practices of interventions aimed at improving  
69 individual quality of life. Such an approach is more effective when we also take the family,  
70 culture, and environmental context into account [4, 9-12]. FQoL is therefore one of the main  
71 outcome measures of services and the provision of family support for people with intellectual  
72 disabilities [7, 9, 13]. Guidance from family members is helpful for individuals with disabilities  
73 [14-17]. In this sense, in the past two decades, the FQoL concept received greater attention for  
74 its development and utilization [9, 18], especially in the field of disability studies [19, 20].  
75 FQoL has been assessed using qualitative [6, 10] and quantitative [10-12] approaches. Especially  
76 for the latter approach, scholars have developed different scales to measure FQoL, such as the  
77 Beach Center Family Quality of Life Scale (BC-FQoL) [11], the International Family Quality of Life  
78 scale [12], and a Latin America FQoL Scale [10]. Among these, we selected the BC-FQoL scale  
79 [11] to measure the FQoL for families of persons with leprosy and podocniosis-related  
80 disabilities. Because this scale is one of the most used instruments to assess FQoL in families  
81 with special needs. It provides concise and quick information about families’ overall well-being  
82 and can be used to address the needs of families giving help to persons with disabilities within

83 their homes [16]. In addition, the BC-FQoL is a psychometrically comprehensive measure that  
84 can be used in research and clinical practice to evaluate programs and services for families of  
85 children with disabilities [21].

86 The BC-FQoL scale was originally developed in United States of America [11]. However, a scale  
87 developed in one country may not work in the same manner in another country [22]. Based on  
88 this concept, a culturally adaptable, valid, and reliable scale plays a pivotal role in the  
89 measurement of FQoL of persons with disabilities and their family members. Previously, the BC-  
90 FQoL Scale has been validated in Spanish [7, 9], Chinese [23, 24], Turkish [25], and (Brazilian)  
91 Portuguese [26]. The BC-FQoL Scale has not been cross-culturally validated in the Ethiopian  
92 context. Therefore, there is a need to culturally validate the scale in Ethiopia before using it to  
93 measure the FQoL persons affected by leprosy and podocniosis.

94 Therefore, the aim of this study was to investigate the cross-cultural validity of the BC-FQoL  
95 scale among persons affected by leprosy and podocniosis in Northwest Ethiopia. Furthermore,  
96 we also aimed to conduct a cross-cultural adaptation of the BC-FQoL Scale to the Amharic  
97 language.

## 98 **Methodology**

### 99 **Ethical considerations**

100 This study was approved by the Debre Markos University, Health Sciences College, Institutional  
101 Research Ethics Review Committee (IRERC) with reference number HSR/R/C/Se/Co/11/13. In  
102 addition, permission letter obtained from the Amhara Public Health Institute. Both the nature  
103 and objective of the study and the confidentiality of the data was clarified to each study

104 participant before the data collection. Participation in the study was voluntarily. Because of the  
105 low literacy level among the study participants, participants gave their verbal informed consent.

## 106 **Study design**

107 The study was a cross-sectional scale validation study.

## 108 **Study site**

109 This study was conducted in Northwest Ethiopia in the East Gojjam Zone. East Gojjam, also  
110 called Misraq Gojjam, is a zone in the Amhara Region of Ethiopia. The zone's capital city  
111 is Debre Markos. Debre Markos is located 300 km away from Addis Ababa, Ethiopia. It is  
112 bordered in the South by the Oromia Region, the West-by-West Gojjam, in the North by South  
113 Gondar, and in the East by South Wollo. The east Gojjam zone has a total population of  
114 2,719,118 people, which comprise of 632,353 households. The zone also has 21 woredas  
115 (districts), 480 kebeles (the smallest administrative unit), 423 health posts, 102 health centers,  
116 10 primary hospitals, and one referral hospital [27]. The main language is Amharic. Both leprosy  
117 and podoconiosis are prevalent in the area [28].

## 118 **Study population, sample size and sampling technique**

119 For the validation of the BC-FQoL, different population groups were selected for the collection  
120 of data. Out of the research team members, six experts participated in the translation, back  
121 translation, and evaluation process. Six persons with podoconiosis also participated for  
122 checking the completeness, understandability of the scale as part of the validation of the study.  
123 To ensure quantitative validation, we sought to include 300 persons affected by leprosy and  
124 podoconiosis with disabilities who are adults and have a view of their family life. Different

125 scholars recommended that the sample size should be calculated in different ways. Based on  
126 Terwee et al 7:1 [29], Kline recommend a participant-to-indicator ratio of 10 up to 20:1 [30],  
127 and Viswesvaran 15:1 or 30:1 [31]. However, according to Comfrey and his colleagues, a sample  
128 size of 50 is considered very poor, 100 is considered poor, 200 is considered fair, 300 is  
129 considered good, 500 is considered very good, and 1000 or more as excellent [32]. Based on  
130 their recommendations, we opted to use a sample size of 300 on the basis that it would be  
131 sufficiently accurate for our needs. Participants were selected based on convenience sampling.  
132 In addition, 50 samples were randomly selected from the initially sampled population. These  
133 people were interviewed again two weeks after the original interviews were conducted as a  
134 means of checking the consistency of the scale used.

### 135 **Eligibility criteria**

136 For the translation, evaluation and back translation of the BC-FQoL Scale researchers, language  
137 experts, psychologist, mental health experts and one of the original scale developer  
138 participated. For quantitative validation, participants who had to live in one of the five districts  
139 included in the study. The persons affected had to be diagnosed with leprosy or podoconiosis  
140 and had to have visible impairments due to their condition. Persons unwilling or unable to give  
141 verbal informed consent, persons younger than 16 years of age were excluded.

### 142 **Measures**

143 The BC-FQoL scale was originally developed by researchers at the Beach Centre on Disability, a  
144 research and training center of the University of Kansas [11]. The scale is intended to quantify  
145 the insights and levels of satisfaction persons with disabilities experience within their Family

146 Quality of Life [8]. This scale contains 25 items with a 5-point Likert scale (1- very dissatisfied, 2-  
147 dissatisfied, 3- neither satisfied nor dissatisfied, 4- satisfied, and 5- very satisfied). The scale  
148 consists of five subscales: 1) family interaction (6 items), 2) parenting (6 items), 3) emotional  
149 well-being (4 items), 4) physical/material well-being (5 items) and 5) disability-related support  
150 (4 items). The total scores for the satisfaction ratings range from 25 to 125 [11]. In addition to  
151 the scale sociodemographic information collected.

## 152 **Translation and adaptation process**

153 We adapted the original English version of the BC-FQoL to Amharic using the procedure  
154 outlined by Borsa et al. [33]. The cross-cultural validation of the BC-FQoL measurement scale  
155 consisted of two main phases. The first phase entailed translation and adaptation, which itself  
156 has five stages: 1) instrument translation from the source language (English) into the target  
157 language (Amharic), 2) synthesis of the translated content, 3) a synthesis evaluation by experts,  
158 4) tool evaluation by the target population (persons with leprosy and podocniosis), and 5)  
159 back translation into English language. In addition, different equivalence of the scale and its  
160 subscales was assessed based on different definitions and criteria such as the conceptual  
161 equivalence pursued through a rigorous process, including forward and backward translation.  
162 Item equivalence considered by the degree to which the items composing the instrument are  
163 identical across cultures. Operational equivalence refers to the possibilities of using a similar  
164 questionnaire format, instructions, mode of administration and measurement methods [29, 34,  
165 35]. The second phase entailed a quantitative validation (assessment of measurement  
166 equivalence).



167 For the initial step of the first phase, the English version of the BC-FQoL Scale was translated by  
168 two authors whose mother tongue is Amharic. First, the researchers performed the translation  
169 independently and then the two translated versions were compared and discussed to ensure  
170 semantic equivalence and agreement with the conceptual framework of the original scale. In  
171 cases of disagreement between the two authors, a third person was invited to solve the  
172 disagreement. This was facilitated using three additional experts (a psychologist, an Amharic  
173 language professor, and a psychiatrist) whose mother tongue is also Amharic. Moreover, the  
174 three experts were also invited to assess the semantic equivalence of the translation and to  
175 provide the authors with written feedback.

176 Back-translation to English was performed by two professors who were fluent in English and  
177 Amharic. The back translation was also done independently and without disclosing the original  
178 version of the scale to the translators. The back-translated version was compared to the original  
179 scale by three authors, and small changes were consequently made on the back translated  
180 version of the scale. Finally, the translated and back-translated scale was sent to the original  
181 scale developers who were asked to review the translations. Based on their feedback, small  
182 corrections were made in the Amharic version of the scale.

183 Furthermore, six persons affected by podoconiosis were asked to assess the legibility, clarity,  
184 and cultural suitability of the Amharic version of the scale. These persons reported that the  
185 items reflected their ideas, and the wording of the items was clear and could be easily  
186 understood. The scale demonstrated adequate face validity. It took about 25 minutes per  
187 participant to complete the interviews with each of the six persons affected by podoconiosis.

188

## 189 **Data collection**

190 Seven health professionals participated in the data collection process. A two-day training on the  
191 objective of the study and the details of the scale idea was given to them by two authors of this  
192 article. The data collectors contacted persons with leprosy and podoconiosis in their homes,  
193 and around their locality. This was done after contacting them through their kebele and leprosy  
194 association leaders. The data collectors explained the objectives of the study and obtained  
195 verbal informed consent before the start of the interview. Confidentiality of the data was  
196 guaranteed throughout the study. Participants were interviewed face to face at their home or  
197 around their locality in a quiet room. The data were collected from August – October 2021.

198

199

## 200 **Data analysis**

201 Epi data version 3.1 was used for data entry, and SPSS version 25.0 for data analysis. SPSS  
202 AMOS version 21.0 was used for confirmatory factor analysis (CFA).

203 Different statistical analyses were carried out to determine the reliability of the Beach Centre  
204 FQoL scale as translated to Amharic. Cronbach's alpha was calculated for the total score of the  
205 scale and the subscales to determine the internal consistency of the instrument. In addition,  
206 the test–retest procedure was used to evaluate the reliability and reproducibility of measures.  
207 This was done with a subsample comprising 50 participants from the overall sample and using a  
208 time interval of two weeks. The test-retest reliability was assessed using the intra-class  
209 correlation coefficient (ICC) and its corresponding 95% confidence interval. The internal

210 consistency and test-retest reliability were considered acceptable when the values of  
211 Cronbach's alpha and ICC exceeded 0.70 [36, 37]. The standard error of measurement  
212 (SEM<sub>agreement</sub>) was also calculated to determine the reproducibility of the scale, using the  
213 formula  $SEM = SD * (\sqrt{1-ICC})$ . The SEM was also converted into the smallest detectable change  
214 ( $SDC = 1.96 * \sqrt{2} * SEM$ ), which reflects the smallest within-person change in score. With a  
215  $P < 0.05$ , this can be interpreted as a "real" change, above measurement error, in one individual  
216 ( $SDC_{ind}$ ). The SDC measurable in a group of people ( $SDC_{group}$ ) can be calculated by dividing  
217 the  $SDC_{ind}$  by  $\sqrt{n}$ . Values above the SDC describe a change in the individual's score above the  
218 error of the measurement [38, 39].

219 Floor and ceiling effects were also calculated. Floor and ceiling effects are considered present if  
220 more than 15% of the respondents achieved the lowest or highest possible score on the scale  
221 [39-41].

222 Finally, Confirmatory Factor Analysis (CFA) with the maximum likelihood estimation was  
223 performed to examine the dimensionality and construct validity of the five-factor structure of  
224 the BC-FQoL. When the first-order latent variables were mutually related and can be accounted  
225 by a second-order latent variable. We examined whether the second-order five-factor structure  
226 of the BC-FQoL fits the Ethiopian family context of persons affected by leprosy and  
227 podocniosis. Model fit was assessed using fit indices including the ratio of  $\chi^2$  to the degrees of  
228 freedom (the  $\chi^2/df$  ratio), the goodness-of-fit index (GFI), the adjusted goodness-of-fit index  
229 (AGFI), the root means square error of approximation (RMSEA), the comparative fit index (CFI)  
230 and the incremental fit index (IFI). A value of 0.90 or more for the CFI and IFI [42, 43], a value of  
231 less than 5 for  $\chi^2/df$ , a value of 0.80 or more for the GFI and AGFI, and an RMSEA value

232 between 0.05 and 0.08 are considered good model fit [44]. In addition, construct reliability  
233 (composite reliability (CR)) of 0.70 or more, and average variance extracted (AVE) of 0.50 or  
234 more were used to assess the convergent validity [45].

235

236

## 237 **Results**

### 238 **Semantic equivalence**

239 Minor changes were made to the first version of the back translated English version of the  
240 scale. For example, for item number 2, originally it said, “My family members help the children  
241 learn to be independent.” Interpreter 1, translated this as “My family members support  
242 children to be self-dependent and responsible.” Interpreter 2 translated this as “My family  
243 members help children to know about self-reliance/management.” We have selected  
244 interpreter 2’s translation by avoiding management at the end of the translated statement.  
245 Similarly for item number 13, “My family has outside help available to us to take care of special  
246 needs of all family members.” However, interpreter 1 translated this as “There is another  
247 body/person to support my family in times of difficulty.” Interpreter 2 translated it as “We have  
248 another person or person to take care of the special needs of my family members.” Based on  
249 this we have selected the later translation.

### 250 **Socio-demographic characteristics of the study participants**

251 A total of 302 persons affected by leprosy (n=166, 55%) or podoconiosis (n=136, 45%)  
 252 participated in the study. Over half of the study participants were male (n=178, 59%), and three  
 253 quarters of the study participants (n=226, 75%) were below 64 years of age (18 – 64 years,  
 254 which is independent age segment of the population in Ethiopian context). The mean age of the  
 255 study participants was 54 ( $\pm 14.2$ ) years. About 79% (n= 239) of the study participants had a  
 256 family size of below five people (which is the average family size of Ethiopia 4.8). Almost 80%  
 257 (n=241) of the participants were not able to read and write and most of the participants  
 258 (n=265, 88%), were farmers. An overview of the demographic information of the participants  
 259 can be found in Table 1. Table 1 also includes the demographic characteristics of the 50  
 260 participants that were interviewed again after two weeks.

261 Table 1. Sociodemographic characteristics of persons affected by leprosy and podoconiosis.

| Variables   |                      | First assessment<br>(n=302) |     | Follow-up<br>assessment (n=50) |     |
|-------------|----------------------|-----------------------------|-----|--------------------------------|-----|
|             |                      | N                           | (%) | N                              | (%) |
| Sex         | Male                 | 178                         | 59  | 32                             | 64  |
|             | Female               | 124                         | 41  | 18                             | 36  |
| Age (years) | ≤64                  | 226                         | 75  | 39                             | 78  |
|             | >64                  | 76                          | 25  | 11                             | 22  |
| Family size | ≤5                   | 239                         | 79  | 33                             | 66  |
|             | >5                   | 63                          | 21  | 17                             | 34  |
| Educational | Can't read and write | 241                         | 80  | 29                             | 58  |

|            |                       |     |    |    |    |
|------------|-----------------------|-----|----|----|----|
| status     | Can read and write    | 38  | 13 | 16 | 32 |
|            | Elementary school     | 13  | 4  | 2  | 4  |
|            | High school and above | 10  | 3  | 3  | 6  |
| Occupation | Farmer                | 265 | 88 | 42 | 84 |
|            | Merchant              | 13  | 4  | 1  | 2  |
|            | Other*                | 24  | 8  | 7  | 14 |
| Condition  | Leprosy               | 166 | 55 | 26 | 52 |
|            | Podoconiosis          | 136 | 45 | 24 | 48 |

262 \*Waiver (3), daily laborer (5), guard (3), carpenter (2), housewife (4), student (2),  
 263 employee (1) and unemployed (4).

## 264 Internal consistency

265 The internal consistency of the BC- FQoL Scale, the overall Cronbach's alpha, was 0.913. For the  
 266 five subscales, Cronbach's alpha ranged from 0.683 to 0.850. Additionally, different items were  
 267 deleted and calculated the Cronbach alpha. However, there was no visible difference in  
 268 Cronbach alpha of both the subscales and the overall BC -FQoL Scale. Reliability statistics are  
 269 summarized in Table 2.

## 270 Reproducibility: reliability and agreement

271 The BC-FQoL scale total score ICCagreement was 0.857 (95% CI: 0.761 – 0.916,  $p < 0.001$ ). For  
 272 the five subscales the ICCagreement ranged from 0.508 – 0.847. The subscale ICCagreement is  
 273 summarized in Table 2. The standard error of measurement (SEM) was 3.01, this is 2.4% of the

274 total score range. The smallest detectable change (SDC) was 8.34, and the SDC group 1.18.

275 Details are summarized in Table 2.

276 Table 2. Reliability of the translated BC-FQoL scale.

| Subscales                    | No. of items | Cronbach's alpha (n = 302) | Cronbach's alpha (if item is deleted) (n = 302) | ICCagreement (95% CI) (n = 50) | SEM (n = 50) | SEM as % of total score range | SDC <sub>ind</sub> = SDC (n = 50) | SDC group (n = 50) |
|------------------------------|--------------|----------------------------|-------------------------------------------------|--------------------------------|--------------|-------------------------------|-----------------------------------|--------------------|
| Family interaction           | 6            | 0.779                      | 0.803 (N18)                                     | 0.613(0.404, 0.760) *          | 2.35         | 7.8%                          | 6.51                              | 0.92               |
| Parenting                    | 6            | 0.692                      | 0.697 (N17)                                     | 0.578(0.362, 0.736) *          | 2.56         | 8.5%                          | 7.10                              | 1.00               |
| Emotional well-being         | 4            | 0.683                      | 0.708 (N9)                                      | 0.508(0.268, 0.688) *          | 1.57         | 7.9%                          | 4.35                              | 0.62               |
| Physical/material well-being | 5            | 0.728                      | 0.718 (N21)                                     | 0.618(0.411, 0.764) *          | 1.95         | 7.8%                          | 5.41                              | 0.76               |
| Disability-related support   | 4            | 0.850                      | 0.842 (N24)                                     | 0.847(0.744, 0.910) *          | 0.92         | 4.6%                          | 2.55                              | 0.36               |
| FQoL total score             | 25           | 0.913                      | 0.913 (FI)                                      | 0.857(0.761,0.916) *           | 3.01         | 2.4%                          | 8.34                              | 1.18               |

277 \*P < 0.001, N represent item number of the BC-FQoL Scale

## 278 **Validity**

279 The five-factor CFA model yielded an acceptable model fit and the five first-order latent  
280 variables correlated well with each other, 0.73–0.91; all  $p < 0.001$  (Fig. 1). Therefore, we  
281 conducted a second-order CFA model to examine the validity of the BC-FQoL (Fig. 2). The  
282 standardized factor loadings were all significant ( $p < 0.001$ ), ranging from 0.65 to 0.99 ratings.  
283 Items all loaded well on the expected latent constructs. The results suggested that improving  
284 the model fit indices yielded an almost adequate fit (the  $\chi^2/df$  ratio 2.941; GFI .820; AGFI .791;  
285 IFI .818; CFI .817 and RMSEA 0.08). This result came after removing item number 5 from the  
286 parenting subscale, item number 9 from emotional well-being subscale and item number 25  
287 from disability related support subscale. The CR values were all well above 0.70 for the  
288 satisfaction ratings. The AVE values which satisfied the criteria of 0.50 and above for all the  
289 subgroups of the BC-FQoL, except the parenting which was almost on the margin of 0.5 (0.492).  
290 Details can be found in Table 3.

291 Table 3. The subgroup of BC-FQoL composite reliability and average variance extracted.

|                              | Composite reliability | Average Variance Extracted |
|------------------------------|-----------------------|----------------------------|
| Family interaction           | 0.896                 | 0.592                      |
| Disability related support   | 0.884                 | 0.658                      |
| Physical/material well-being | 0.841                 | 0.516                      |
| Emotional well-being         | 0.802                 | 0.504                      |
| Parenting                    | 0.852                 | 0.494                      |

292

293

294



295

296

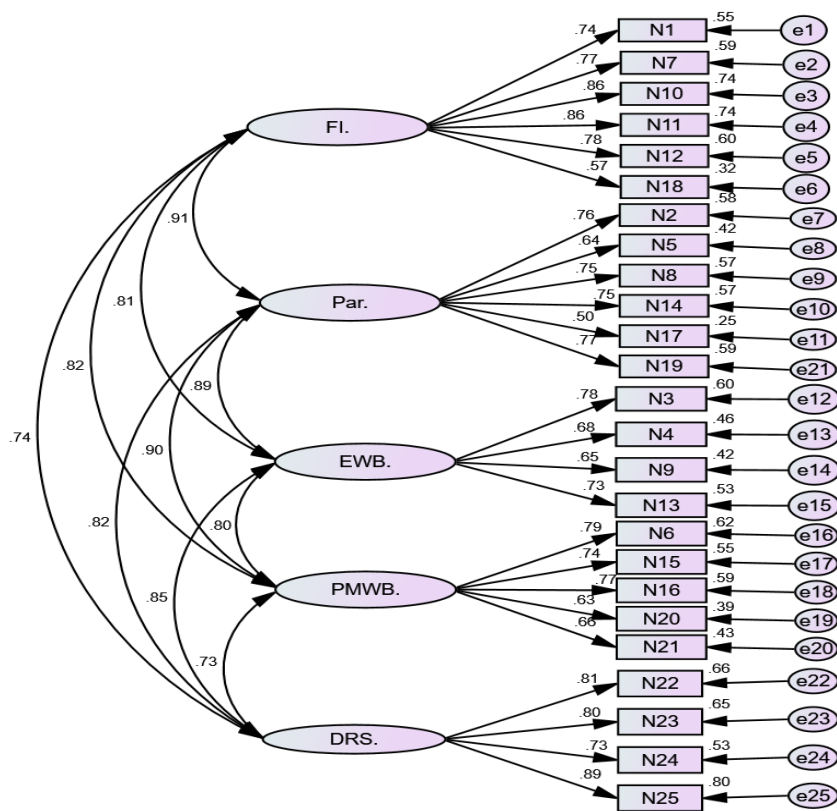

297

298 Figure 1. Measurement model of the Beach Centre Family Quality of Life scale and its result.

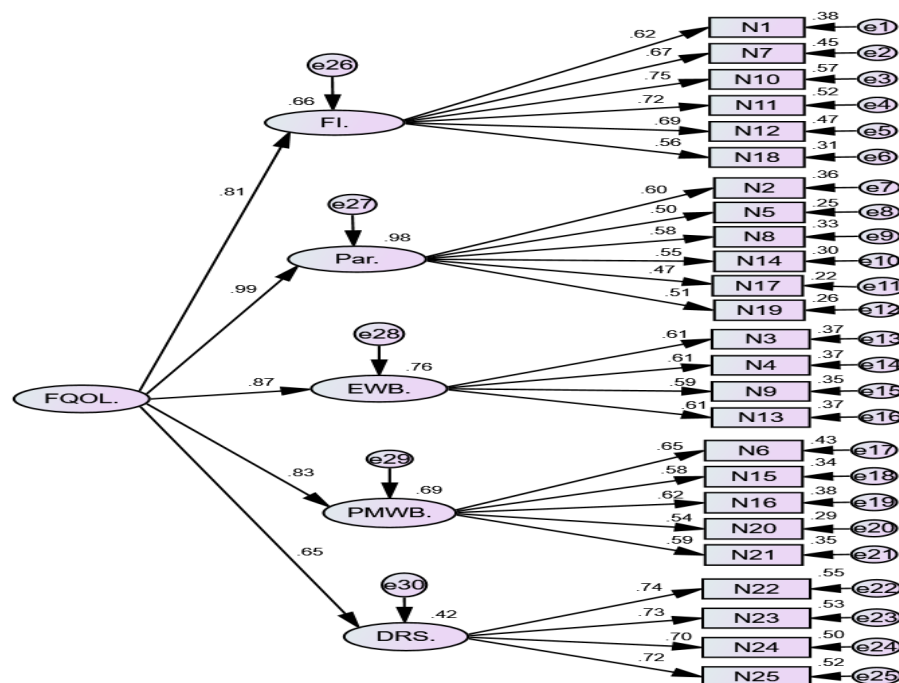

299  
 300 Figure 2. Standardized parameter estimates from confirmatory factor analysis of the Beach Centre  
 301 Family Quality of Life scale: second-order five-factor model.

### 302 Floor and ceiling effects

303 There are no floor and ceiling effects (Table 4).

304 Table 4. Floor and ceiling effect of BC-FQoL scale among persons affected by leprosy and  
 305 podoconiosis.

| (Sub)scale         | Range of (sub)scale | Number of people with the lowest score | Floor effect* | Number of people with the highest score | Ceiling effect* |
|--------------------|---------------------|----------------------------------------|---------------|-----------------------------------------|-----------------|
| Family interaction | 6-30                | 1                                      | No            | 15                                      | No              |
| Parenting          | 6-30                | 1                                      | No            | 4                                       | No              |
| Emotional WB       | 4-20                | 11                                     | No            | 4                                       | No              |
| Physical WB        | 5-25                | 3                                      | No            | 3                                       | No              |

|                            |        |   |    |    |    |
|----------------------------|--------|---|----|----|----|
| Disability-related support | 4-20   | 6 | No | 26 | No |
| FQoL total score           | 25-125 | 0 | No | 0  | No |

306 \*) The total number of participants is 302. This means floor and ceiling effects are present,  
 307 when 45 people (15%) have the lowest or highest possible score.

## 308 Interpretability

309 The means and SD of the different subgroups of the baseline data (n = 302) show varied results  
 310 as illustrated in Table 4.

311 The mean total score of BC-FQoL scale is higher in male participants. Among age groups, the  
 312 BC-FQoL is slightly higher in the ≤64 years category. The BC-FQoL scale mean total scores were  
 313 highest within the ‘able to read and write’ category, followed by the ‘can’t read and write’  
 314 category among education groups. From the occupation group ‘merchants’, the total mean  
 315 score was higher than ‘farmers’ and other occupations. Finally, BC-FQoL total scores are higher  
 316 among persons affected by leprosy in comparison to persons with podoconiosis. Details of this  
 317 are presented in Table 5.

318 Table 5. The mean and standard deviation of Beach Centre Family Quality of Life Scale among  
 319 persons affected by leprosy and podoconiosis.

| Variables   |               | Mean (SD)    |
|-------------|---------------|--------------|
| Sex         | Male (n=178)  | 77.09(17.50) |
|             | Female(n=124) | 73.19(17.65) |
| Age (Years) | ≤64(n=226)    | 74.72(18.60) |
|             | >64(n=76)     | 73.29(21.13) |

|                                  |                               |              |
|----------------------------------|-------------------------------|--------------|
| Family size                      | ≤5(n=239)                     | 74.72(18.59) |
|                                  | >5(n=63)                      | 78.41(13.14) |
| Educational status               | Can't read and write (n=241)  | 75.07(17.40) |
|                                  | Can read and write (n=38)     | 82.42(24.39) |
|                                  | Elementary school (n= 13)     | 68.77(24.35) |
|                                  | High school and above (n= 10) | 68.10(20.51) |
| Occupation                       | Farmer (n=265)                | 75.89(16.56) |
|                                  | Merchant (n=13)               | 86.46(24.39) |
|                                  | Other*(n=24)                  | 65.17(20.71) |
| Type of diseases affected person | Leprosy (n=166)               | 76.93(13.51) |
|                                  | Podoconiosis (n=136)          | 73.73(21.55) |

320 \*Waiver (3), daily laborer (5), guard (3), carpenter (2), housewife (4), student (2),  
 321 employee (1) and unemployed (4).

## 322 Discussion

323 This study aimed to validate the BC-FQoL Scale cross-culturally into the Amharic language, and  
 324 subsequently report the cross-cultural validation and psychometric properties of the scale in  
 325 persons with leprosy and podoconiosis in Northwest Ethiopia.

326 The cross-cultural adaptation and validation of BC-FQoL Scale was performed based on the  
 327 recommendations of different scholars [29, 33-35] review. Semantic equivalence was assessed  
 328 through a process of translation and back-translation. Following these steps, small corrections

329 were made to the Amharic translation of the BC-FQoL scale. This was done based on expert  
330 evaluations and the feedback of the original tool developers and input of the target population.  
331 The quantitative data analysis results of this study showed a high level of reliability or internal  
332 consistency, higher than the cut-off value of 0.7 for Cronbach's alpha [37, 46]. It was also  
333 consistent with the original scale and other researchers' findings of internal consistency of the  
334 BC -FQoL [11, 24, 47-49]. The Cronbach's alpha of the subgroups was also in the acceptable  
335 range in all cases except for the parenting and emotional well-being subgroups, which was  
336 nearer to 0.7. Similarly, the result showed an overall excellent agreement or substantial  
337 reliability of test-retest ICC of the scale in comparison to different validation studies [37, 38,  
338 50]. This is comparable with a validation study on the Spanish adaptation and validation of the  
339 BC -FQoL Scale [49].

340 The standard error of measurement of the BC-FQoL Scale was <5%, which is considered a very  
341 good SEM agreement and is within the acceptable range. This is because of the percentage of  
342 the standard error of measurement (SEM) related to the total score of the questionnaire [46,  
343 51]. The SDC of the BC-FQoL Scale was also within an acceptable range, which is in line with  
344 findings from other researchers [38, 52-54].

345 Our CFA indicated that the Amharic version of the BC-FQoL Scale produces reliable results. The  
346 first and second order CFA model showed acceptable factor loadings for all items except item  
347 17 (0.47) which has the nearest margin of 0.5. Overall, this result is comparable with the study  
348 done by Chiu et al. in China [24], Verdugo et al. in Spain [49] and the original BC-FQoL scale  
349 [11]. Similarly, the model fit indices were within acceptable range even though these results  
350 came after improving the model by removing item 5, 9 and 25 from the Scale. However, the

351 items which were removed were considered necessary by the experts in the present study, as  
352 each item addresses important points in their respective subgroups. For example, item 5 in  
353 parenting, which is "my family members help the children with schoolwork and activities", is  
354 vital because of the effect of disability on education [55]. Item 9, "my family members have  
355 some time to pursue our own interests", was also considered essential in the Ethiopian context,  
356 which considers giving time for other members of the family an asset of Ethiopian family  
357 culture. In addition, item 25, "my family has good relationships with the service providers who  
358 provide services and support to our family member with a disability", has great importance  
359 within the Ethiopian context because of the stigma related to disability [55].

360 Thus the model fit indices results were comparable with the original validation study [11] and  
361 other validation studies of the BC-FQoL scale [9, 49]. This study found high composite reliability  
362 (CR) which indicated how the subgroup items showed composite reliability to each other within  
363 the BC-FQoL scale. This is similar to the study findings with the original scale [11] and Mandarin  
364 Chinese versions of the scale results [24].

365 The convergent validity of this study result indicated an acceptable range even though the  
366 average variance extracted (AVE) of the parenting subgroup was 0.494, close to the cut- off  
367 value of 0.5. However, this is acceptable on the basis of research done by Fornell and Larcker,  
368 which states that if AVE is less than 0.5, and CR is be higher than 0.6, the convergent validity of  
369 the construct is still tolerable [56]. This was also the case in our study.

370 Besides the above measure of reliability and validity of the BC-FQoL Scale there were no floor  
371 and ceiling effects overall and the subgroups. This has good implications for the scale's  
372 reproducibility and responsiveness [29, 41].

373 In this validation study, the mean total score of BC-FQoL scale is higher in male participants.  
374 This is supported by the study conducted in Ethiopia [57]. Because females engaged more in  
375 caregiver stress and not taking on major social roles in education and employment [58]. In  
376 addition, Tsutsumi et al. study result showed that an overall lower quality of life score for  
377 women than men, a higher mental burden among women compared to men, and perceived  
378 stigma affecting QOL of women more negatively than that of men [59]. The BC-FQoL is slightly  
379 higher in the  $\leq 64$  years category. Because above 64 years of age is dependent group of the  
380 family in the Ethiopian context [60]. Moreover, the BC-FQoL Scale mean total scores were  
381 highest within the 'able to read and write' category. This result supported adults with  
382 disabilities tend to be poorer than those without disabilities, but education weakens this  
383 association [61]. Finally, BC-FQoL total scores are higher among persons affected by leprosy in  
384 comparison to persons with podoconiosis. This finding supported by the study done in Ethiopia  
385 [57] persons affected by podoconiosis more stigmatized and discriminate than persons affected  
386 by leprosy. Persons affected by leprosy were association members that gave chance of getting  
387 support from the peers and this provide sense of empowerment [62]. On the other hand,  
388 association members of associations of persons affected by leprosy have a chance to take a  
389 loan from the association. This supported by research conducted by Wang et al, which  
390 indicated that family income is associated with family quality of life [63].

391 One of the limitations of this study was the use of a convenience sampling technique. Use of  
392 the instrument in a more heterogeneous and representative sample of families with disabilities  
393 receiving disability management intervention may be needed to further validate the scale.  
394 Other studies on the use of the Amharic version of the BC-FQoL are needed in other Amharic-

395 speaking populations and on families of disabled children or families of adults without  
396 disabilities, to support its use in other populations. The study used a cross-sectional design to  
397 validate the BC-FQoL.

## 398 **Conclusion and Recommendation**

399 The Amharic version of the BC -FQoL is reliable and valid in families of persons affected by  
400 leprosy and podoconiosis in Northwest Ethiopia. The instrument could be applied in clinical  
401 practice, service evaluation and research to assess FQoL in Amharic-speaking populations with  
402 leprosy and podoconiosis related disabilities which were or are the recipients of family-based  
403 disability management intervention.

## 404 **Acknowledgments**

405 First, we would like to express our gratitude to Gozamin Woreda health officials, for facilitating  
406 the selection of data collectors and writing a cooperation letter. We would like to acknowledge  
407 those professionals participated in the translation and back translation process. We would like  
408 to thank Dr. Jean Ann Summers, a team member of the Beach Center Family Quality of Life  
409 original developer of the scale as evaluating the back translation. Our acknowledgment goes to  
410 all leprosy-affected person association leaders of Bichena, Motta, and Shebel Berenta for their  
411 cooperation in recruiting, assisting the data collection process in the specified areas. The  
412 research team also acknowledges the data collectors and study participants. The deepest  
413 appreciation also goes to Ethiopian National Association of Leprosy affected Person (ENAPAL)  
414 staff for facilitating the overall process of data collection especially Tesfaye Tadesse and Abiy



415 Abate. We would like to thank Jane Strugar Kolešnik from Disability Studies in Nederland for her  
416 help of editing English language.

## 417 **Funding**

418 This study is funded by the Leprosy Research Initiative Foundation (LRI, [leprosyresearch.org](http://leprosyresearch.org))  
419 under project number 708.20.17. The funders had no role in study design, data collection and  
420 analysis, decision to publish, or preparation of the manuscript.

## 421 **Conflicts of interest**

422 The authors have declared that there is no conflict of interest.

## 423 **Author Contributions**

424 Conceptualization: Anna T. van 't Noordende, Moges Wubie Aycheh, Alice Schippers. Data  
425 curation: Moges Wubie Aycheh, Nurilign Abebe Moges, Anna T. van 't Noordende. Formal  
426 analysis: Moges Wubie Aycheh, Anna T. van 't Noordende. Funding acquisition: Anna T. van 't  
427 Noordende, Alice Schippers, Moges Wubie Aycheh. Investigation: Moges Wubie Aycheh.  
428 Methodology: Moges Wubie Aycheh, Anna T. van 't Noordende, Nurilign Abebe Moges, Alice  
429 Schippers. Project administration: Nurilign Abebe Moges. Resources: Nurilign Abebe Moges.  
430 Software: Moges Wubie Aycheh, Anna T. van 't Noordende. Supervision: Anna T. van 't  
431 Noordende, Alice Schippers. Validation: Moges Wubie Aycheh, Nurilign Abebe Moges, Anna T.  
432 van 't Noordende. Writing – original draft: Moges Wubie Aycheh. Writing – review & editing:  
433 Moges Wubie Aycheh, Anna T. van 't Noordende, Nurilign Abebe Moges, Alice Schippers.

434

435

## 436 **References**

- 437 1. Turnbull AP, Turnbull HJRPIISE. From the old to the new paradigm of disability and families:  
438 Research to enhance family quality of life outcomes. 2002;83-119.
- 439 2. Cummins RaJJOaRIID. Self-rated quality of life scales for people with an intellectual disability: a  
440 review. 1997;10(3):199-216.
- 441 3. Zuna NI, Turnbull A, Summers JA. Family quality of life: Moving from measurement to application.  
442 Journal of Policy Practice in Intellectual Disabilities. 2009;6(1):25-31.
- 443 4. Summers JA, Poston D, Turnbull A, Marquis J, Hoffman L, Mannan H, et al. Conceptualizing and  
444 measuring family quality of life. 2005;49(10):777-83.
- 445 5. Zuna NI, Brown I, Brown RI. Family quality of life in intellectual and developmental disabilities: A  
446 support-based framework to enhance quality of life in other families. 2014.
- 447 6. Poston D, Turnbull A, Park J, Mannan H, Marquis J, Wang M. Family quality of life: A qualitative  
448 inquiry. J Mental retardation. 2003;41(5):313-28.
- 449 7. Schalock RL, Verdugo MA, Braddock DL. Handbook on quality of life for human service practitioners:  
450 American Association on Mental Retardation Washington, DC; 2002.
- 451 8. Park J, Hoffman L, Marquis J, Turnbull AP, Poston D, Mannan H, et al. Toward assessing family  
452 outcomes of service delivery: Validation of a family quality of life survey. J Journal of intellectual  
453 disability research. 2003;47(4-5):367-84.
- 454 9. Balcells-Balcells A, Giné C, Guàrdia-Olmos J, Summers JJJOIDR. Family quality of life: Adaptation to  
455 Spanish population of several family support questionnaires. 2011;55(12):1151-63.
- 456 10. Aznar A, Castanon DJJOIDR. Quality of life from the point of view of Latin American families: A  
457 participative research study. 2005;49(10):784-8.
- 458 11. Hoffman L, Marquis J, Poston D, Summers JA, Turnbull AJJOM, Family. Assessing family outcomes:  
459 Psychometric evaluation of the beach center family quality of life scale. 2006;68(4):1069-83.

- 460 12. Isaacs BJ, Brown I, Brown RI, Baum N, Myerscough T, Neikrug S, et al. The international family  
461 quality of life project: Goals and description of a survey tool. 2007;4(3):177-85.
- 462 13. Turnbull AP, Summers JA, Lee SH, Kyzar KJMR, Reviews DDR. Conceptualization and measurement of  
463 family outcomes associated with families of individuals with intellectual disabilities. 2007;13(4):346-  
464 56.
- 465 14. Lindstrom L, Doren B, Miesch JJEC. Waging a living: Career development and long-term employment  
466 outcomes for young adults with disabilities. 2011;77(4):423-34.
- 467 15. Rupp K, Ressler SJOVR. Family caregiving and employment among parents of children with  
468 disabilities on SSI. 2009;30(3):153-75.
- 469 16. Samuel P, Rillotta F, Brown IJJOIDR. The development of family quality of life concepts and  
470 measures. 2012;56(1):1-16.
- 471 17. Fong VC, Gardiner E, Iarocci GJA. Cross-cultural perspectives on the meaning of family quality of life:  
472 Comparing Korean immigrant families and Canadian families of children with autism spectrum  
473 disorder. 2021;25(5):1335-48.
- 474 18. McWilliam R. Working with families of young children with special needs: Guilford Press; 2010.
- 475 19. Wang M, Kober RJJOIDR. Embracing an era of rising family quality of life research. Wiley Online  
476 Library; 2011. p. 1093-7.
- 477 20. Hsiao YJJOP, Disabilities PII. Autism spectrum disorders: Family demographics, parental stress, and  
478 family quality of life. 2018;15(1):70-9.
- 479 21. Van Beurden AJRA. Critical evaluation of the Beach Center Family Quality of Life Scale (FQOL-Scale).  
480 2011;26(2016):2010-11.
- 481 22. Hirsh-Pasek K, Kochanoff A, Newcombe NS, De Villiers JJSFRICD. Using Scientific Knowledge to  
482 Inform Preschool Assessment: Making the Case for " Empirical Validity". Social Policy Report. Volume  
483 19, Number 1. 2005.

- 484 23. Hu X, Wang M, Fei XJJOIDR. Family quality of life of Chinese families of children with intellectual  
485 disabilities. 2012;56(1):30-44.
- 486 24. Chiu SJ, Chen PT, Chou YT, Chien LYJJOIDR. The Mandarin Chinese version of the Beach Centre  
487 Family Quality of Life Scale: development and psychometric properties in Taiwanese families of  
488 children with developmental delay. 2017;61(4):373-84.
- 489 25. Meral BFJEVB. Turkish adaptation, validity and reliability study of the Beach Center Family quality of  
490 life scale. 2013;38(170).
- 491 26. Jorge BM, Levy CCaDC, Granato L, editors. Cultural adaptation quality of family life scale for the  
492 Brazilian Portuguese. CoDAS; 2015: SciELO Brasil.
- 493 27. Department EGZH. Six Month Report. 2022.
- 494 28. Molla YB, Tomczyk S, Amberbir T, Tamiru A, Davey GJPNTD. Podoconiosis in East and west gojam  
495 zones, northern ethiopia. 2012;6(7):e1744.
- 496 29. Terwee CB, Bot SD, De Boer MR, Van Der Windt DA, Knol DL, Dekker J, et al. Quality criteria were  
497 proposed for measurement properties of health status questionnaires. 2007;60(1):34-42.
- 498 30. Kline RB. Principles and practice of structural equation modeling: Guilford publications; 2015.
- 499 31. Viswesvaran CJPP. Multiple regression in behavioral research: Explanation and prediction.  
500 1998;51(1):223.
- 501 32. Comrey A, Lee HJI, Publishers. A first course in factor analysis. Hillsdale, NJ, Lawrence Erlbaum  
502 Associates. 1992.
- 503 33. Borsa JC, Damásio BF, Bandeira DRJP. Adaptación y validación de instrumentos psicológicos entre  
504 culturas: Algunas consideraciones. 2012;22(53):423-32.
- 505 34. Herdman M, Fox-Rushby J, Badia XJQOLR. A model of equivalence in the cultural adaptation of  
506 HRQoL instruments: the universalist approach. 1998;7(4):323-35.

- 507 35. Herdman M, Fox-Rushby J, Badia XJQOLR. 'Equivalence' and the translation and adaptation of health-  
508 related quality of life questionnaires. 1997;6(3):0-.
- 509 36. Henson RKJM, Counseling EI, Development. Understanding internal consistency reliability estimates:  
510 A conceptual primer on coefficient alpha. 2001;34(3):177-89.
- 511 37. Hartley SL, Maclean Jr WJJOIDR. A review of the reliability and validity of Likert-type scales for  
512 people with intellectual disability. 2006;50(11):813-27.
- 513 38. Darter BJ, Rodriguez KM, Wilken JMJRQFE, Sport. Test-retest reliability and minimum detectable  
514 change using the k4b2: oxygen consumption, gait efficiency, and heart rate for healthy adults during  
515 submaximal walking. 2013;84(2):223-31.
- 516 39. Costa LDCM, Maher CG, Mcauley JH, Hancock MJ, De Melo Oliveira W, Azevedo DC, et al. The  
517 Brazilian-Portuguese versions of the McGill Pain Questionnaire were reproducible, valid, and  
518 responsive in patients with musculoskeletal pain. 2011;64(8):903-12.
- 519 40. Davidson G, Irvine R, Corman M, Kee F, Kelly B, Leavey G, et al. Measuring the quality of life of  
520 people with disabilities and their families: scoping study final report. 2017.
- 521 41. Maher CG, Latimer J, Costa LOJBJOPT. The relevance of cross-cultural adaptation and clinimetrics for  
522 physical therapy instruments. 2007;11:245-52.
- 523 42. Bollen KaJSM, Research. A new incremental fit index for general structural equation models.  
524 1989;17(3):303-16.
- 525 43. Abd-El-Fattah SMJJOaQM. Structural Equation Modeling with AMOS: Basic Concepts, Applications  
526 and Programming. 2010;5(2):365-8.
- 527 44. Hair JF, Anderson RE, Babin BJ, Black WC. Multivariate data analysis: A global perspective (Vol. 7).  
528 Upper Saddle River, NJ: Pearson; 2010.
- 529 45. Bagozzi RP, Yi YJJOTaOMS. On the evaluation of structural equation models. 1988;16(1):74-94.

- 530 46. Oliveira IS, Costa L, Manzoni AC, Cabral CBJOPT. Assessment of the measurement properties of  
531 quality of life questionnaires in Brazilian women with breast cancer. 2014;18:372-83.
- 532 47. Classics Cronbach LJP. Coefficient alpha and the internal structure of tests. 1951;16:297-334.
- 533 48. Hays R, Anderson R, Revicki DJQLR. Psychometric considerations in evaluating health-related  
534 quality of life measures. 1993;2(6):441-9.
- 535 49. Verdugo M, Córdoba L, Gómez JJOIDR. Spanish adaptation and validation of the Family Quality of  
536 Life Survey. 2005;49(10):794-8.
- 537 50. Bartko JJJPR. The intraclass correlation coefficient as a measure of reliability. 1966;19(1):3-11.
- 538 51. Ostelo RW, De Vet HC, Knol DL, Van Den Brandt PaJJOCE. 24-item Roland-Morris Disability  
539 Questionnaire was preferred out of six functional status questionnaires for post-lumbar disc surgery.  
540 2004;57(3):268-76.
- 541 52. Brehm M-A, Nollet F, Harlaar JJaOPM, Rehabilitation. Energy demands of walking in persons with  
542 postpoliomyelitis syndrome: relationship with muscle strength and reproducibility. 2006;87(1):136-  
543 40.
- 544 53. Mclaughlin JE, King G, Howley ET, Bassett Jr DR, Ainsworth BEJJOSM. Validation of the COSMED K4  
545 b2 portable metabolic system. 2001;22(04):280-4.
- 546 54. Geerinck A, Alekna V, Beudart C, Bautmans I, Cooper C, De Souza Orlandi F, et al. Standard error of  
547 measurement and smallest detectable change of the SarQoL questionnaire: an analysis of subjects  
548 from 9 validation studies. 2019;14(4).
- 549 55. Van 'T Noordende AT, Aycheh MW, Schippers AJPNTD. The impact of leprosy, podoconiosis and  
550 lymphatic filariasis on family quality of life: A qualitative study in Northwest Ethiopia.  
551 2020;14(3):e0008173.
- 552 56. Fornell C, Larcker DFJJOMR. Evaluating structural equation models with unobservable variables and  
553 measurement error. 1981;18(1):39-50.

- 554 57. Van't Noordende AT, Aycheh MW, Schippers APJTOTRSOTM, Hygiene. An exploration of family  
555 quality of life in persons with leprosy-, lymphatic filariasis–and podoconiosis-related disabilities and  
556 their family members in Ethiopia. 2020;114(12):1003-12.
- 557 58. Tefera B, Van Engen M, Van Der Klink J, Schippers AJD, Society. The grace of motherhood: disabled  
558 women contending with societal denial of intimacy, pregnancy, and motherhood in Ethiopia.  
559 2017;32(10):1510-33.
- 560 59. Tsutsumi A, Izutsu T, Islam MA, Amed JU, Nakahara S, Takagi F, et al. Depressive status of leprosy  
561 patients in Bangladesh: association with self-perception of stigma. 2004;75(1):57-66.
- 562 60. Bank TW. Ethiopia: Age dependency ratio. 2021.
- 563 61. Filmer DJTWBER. Disability, poverty, and schooling in developing countries: results from 14  
564 household surveys. 2008;22(1):141-63.
- 565 62. Solomon PJPRJ. Peer support/peer provided services underlying processes, benefits, and critical  
566 ingredients. 2004;27(4):392.
- 567 63. Wang M, Turnbull AP, Summers JA, Little TD, Poston DJ, Mannan H, et al. Severity of disability and  
568 income as predictors of parents' satisfaction with their family quality of life during early childhood  
569 years. 2004;29(2):82-94.
- 570
